# Supplementary material for: ROOT HAIR DEFECTIVE SIX‐LIKE4 (RSL4) promotes root hair elongation by transcriptionally regulating the expression of genes required for cell growth
Source: PubMed Central journal article supplement (PMC5111604; doi:10.1111/nph.14095), 2016-07-25
Supplement: NPH-212-944-s001.pdf [file NPH-212-944-s001.pdf]

**New Phytologist Supporting Information**

Article title: **RSL4 promotes root hair elongation by transcriptionally regulating the expression of genes required for cell growth**

Authors: Priya Vijayakumar, Sourav Datta and Liam Dolan

Article acceptance date: 5 June 2016

The following Supporting Information is available for this article:

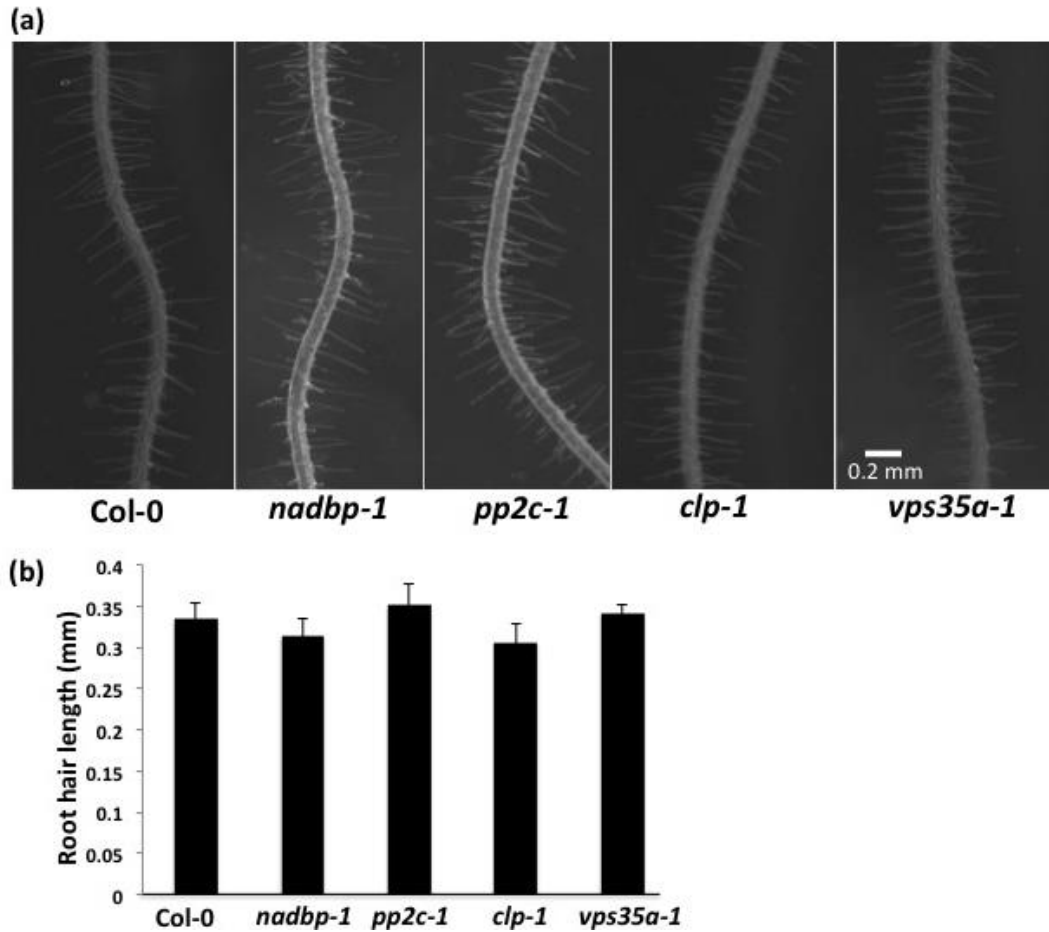

**Fig. S1** (a) Images of 6-d-old *Arabidopsis thaliana* wild type Col-0, *nadbp-1*, *pp2c-1*, *clp-1* and *vps35a-1* roots grown on MS plates with 0.5% Phytigel. (b) Root hair length measurements of 6-d-old wild type (Col-0), *nadbp-1*, *pp2c-1*, *clp-1* and *vps35a-1* plants ( $n = 15$ ). Error bars represent SEM.

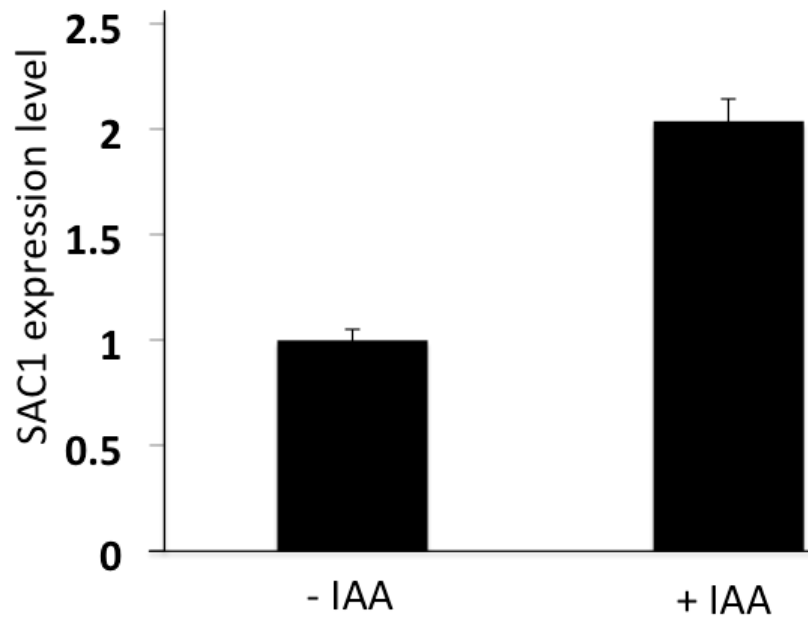

**Fig. S2** SAC1 mRNA level in absence and presence of exogenously applied 100 nM IAA ( $n = 3$ ). Error bars represent SEM.

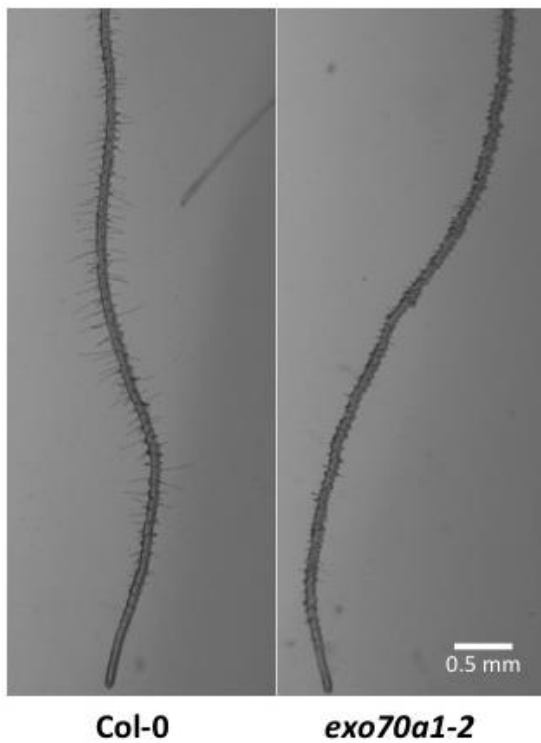

**Fig. S3** Images of 6-d-old *Arabidopsis thaliana* wild type (Col-0) and *exo70a1-2* mutants with short root hairs grown on MS plates with 0.5% Phytigel.

**Table S1** List of primers used in this study.

**Primers used to confirm the GR: RSL4 fusion construct**

**Primers within the 5'UTR and promoter of *RSL4***

**ATTB4:** GGGGACAACCTTTGTATAGAAAAGTTGATACGCGTTGGGCTTAAATG

**ANTI578:** CCTAAAACCTAAACGCGGTG

**Primers within the CDS+3'UTR of *RSL4***

**RDL2 KpnI:** CGGGGTACCATGGACGTTTTTGTGATGGT

**RDL2 BamHI:** CTTTTGTCTCGGCTTATGTGAGGATCCGCG

**Primers within the GR sequence:**

**GR forward:** CAAAGGGATTCAGCAAGCCAC

**GR reverse:** CCTTACCTACTGCTTCCAGACATTT

**Table S2** 1022 genes in *Arabidopsis thaliana* that were expressed more than twice as high in DEX treated *GR:RSL4 rsl2 rsl4* plants than in mock treated plants with a *P* value < 0.0001. (See separate Excel file.)

**Table S3** 259 genes in *Arabidopsis thaliana* that were expressed more than twice as high in DEX+CHX treated *GR:RSL4 rsl2 rsl4* than in mock treated plants with a *P* value < 0.001. (See separate Excel file.)

**Table S4** 130 genes in *Arabidopsis thaliana* whose expression was increased by more than two-fold in both DEX and DEX+CHX treated *GR:RSL4 rsl2 rsl4* plants compared to mock treatment. (See separate Excel file.)

**Table S5** List of mutants used in this study with details of T-DNA insertions

| <b>Mutant alleles</b>       | <b>Gene name</b> | <b>Gene code</b> | <b>Insertion code</b>    |
|-----------------------------|------------------|------------------|--------------------------|
| <i>gbf2-2</i>               | GBF2             | AT4G01120        | SALK_206654              |
| <i>exo70a1-1, exo70a1-2</i> | EXO70A1          | AT5G03540        | SALK_014826, SALK_135462 |
| <i>nadbp-1</i>              | NADBP            | AT1G01800        | SALK_009967              |
| <i>pp2c-1</i>               | PP2C             | AT3G17090        | SALK_203806              |
| <i>clp-1</i>                | CLP              | AT1G26940        | SALK_054035              |
| <i>cpk11-2</i>              | CDPK2/CPK11      | AT1G35670        | SALK_054495              |
| <i>prx7-1</i>               | PRX7             | AT1G30870        | GK_476A09-019131         |
| <i>vps35a-1</i>             | VPS35B/ LAZ4     | AT1G75850        | SALK_014345              |
| <i>sac1-2</i>               | SAC1             | AT1G22620        | SALK_070875              |
